1 **Novel orthonairovirus in rodents and shrews, Gabon**

2

3 **Running Title: Novel orthonairovirus in Gabon.**

4

5 **Authors:**

6 Takehiro Ozeki, Haruka Abe, Yuri Ushijima, Chiméne Nze-Nkogue, Etienne F Akomo-Okoue,

7 Ghislain W.E Ella, Lilian B.M Koumba, Branly C.B.B Nzo, Rodrigue Mintsá-Nguema, Patrice

8 Makouloutou-Nzassi, Boris K Makanga, Fred L.M Nguelet, Georgelin N Ondo, Marien J.V.M

9 Mbadinga, Yui Igasaki, Sayaka Okada, Bertrand Lell, Laura C. Bonney, Roger Hewson, Yohei

10 Kurosaki and Jiro Yasuda.

11

12 Author affiliations: Nagasaki University, Nagasaki, Japan (T. Ozeki, H. Abe, Y. Ushijima, Y. Igasaki, S.

13 Okada, Y. Kurosaki, J. Yasuda); L'Institut de Recherche en Ecologie Tropicale (IRET), Libreville,

14 Gabon (C. Nze-Nkogue, E.F. Akomo-Okoue, G.W.E. Ella, L.B.M. Koumba, B.C.B.B. Nzo, R.

15 Mintsá-Nguema, P. Makouloutou-Nzassi, B.K. Makanga, F.L.M. Nguelet); Centre de Recherche

16 Médicales de Lambaréné (CERMEL), Lambaréné, Gabon (G.N. Ondo, M.J.V.M. Mbadinga, B. Lell);

17 University of Tübingen, Tübingen, Germany (B. Lell); and Medical University of Vienna, Vienna,

18 Austria (B. Lell); United Kingdom Health Security Agency (UKHSA), Porton Down, Salisbury, UK

19 (L.C. Bonney, R. Hewson)

20

21 **Abstract**

22 Small mammals harbor various zoonotic viruses and are natural reservoirs for emerging viruses.  
23 Here, we identified a novel orthonairovirus, which is genetically close to the virus suggested the  
24 association with human neural diseases. The virus was found in 24.6% of the small mammals captured  
25 in Gabon, Central Africa.

26

27 **Text**

28 Small mammals, including rodents and shrews, are natural reservoirs of many zoonotic  
29 pathogens. These animals host highly pathogenic human viruses such as Lassa, Machupo, Junin, hanta,  
30 and Crimean-Congo hemorrhagic fever viruses, all of which belong to order *Bunyavirales* (1).  
31 Rodent-borne viral diseases, such as Lassa fever, have emerged in sub-Saharan Africa. Thus, local  
32 residents are at a potentially high risk of viral exposure under poor sanitary conditions, particularly in  
33 rural areas (2). Moreover, several viruses, including Tanganya virus of genus *Orthohantavirus* and  
34 Thiafora virus (TFAV) of genus *Orthonairovirus*, both belonging to *Bunyavirales*, have been identified  
35 in the musk shrews (*Crocidura* sp.) in Western Africa (3,4). Accordingly, small mammal populations  
36 hosting numerous zoonotic viruses may pose a public health threat to humans in sub-Saharan Africa.  
37 Due to high rate of annually reported Lassa fever cases in Western Africa, several investigations  
38 of small mammal-borne viruses have been conducted in the region, thereby multiple zoonotic viruses

39 have been identified (5-8). In contrast, in Central Africa, no clinical cases of Lassa fever or other  
40 rodent-borne human viral diseases have been reported which indicates that few small mammal-borne  
41 viral surveillance studies have been conducted (5). Nonetheless, recent serological surveillance studies  
42 have provided evidence of past infection of rodent-borne viruses among residents of Central African  
43 countries (9,10). This suggested that unrecognized zoonotic viruses might be present in this region.  
44 Therefore, to understand the potential risks of transmission of known and unknown zoonotic small  
45 mammal borne viruses, we investigated the viruses present among small mammal populations in  
46 Gabon, Central Africa.

47

## 48 **The Study**

49 Between 2019 and 2020, 281 animals (152 rodents and 129 shrews) were captured using Sherman  
50 and Tomahawk traps placed in a forest near the suburban area, and bushes around human dwellings in  
51 Lambaréné, Central Gabon. After organ specimens were collected by dissection, tissue RNA was  
52 extracted from kidney homogenates, as described previously (10). Virus screening was performed  
53 using the PrimeScript II High Fidelity One Step RT-PCR Kit (Takara Bio, Shiga, Japan). We initially  
54 targeted partially conserved nucleotide sequences of three genera of viruses: *Mammarenavirus*,  
55 *Orthohantavirus*, and *Orthonairovirus*, belonging to the order *Bunyvirales*. For the RT-PCR detection  
56 of mammarenavirus and orthohantavirus, we employed the pan-viral family primer sets described  
57 previously (8,11). For orthonairovirus, a primer set was designed based on an alignment of sequences

58 of a highly conserved region on the large segment (Appendix Table). All RT-PCR was performed  
59 under the following conditions: 10 min at 45 °C, 2 min at 94 °C, 35 cycles each of 10 s at 98 °C, 15 s at  
60 45 °C, and 10 s at 68 °C. All amplicons were confirmed by Sanger sequencing, and the obtained  
61 sequences were identified by BLAST search (<https://blast.ncbi.nlm.nih.gov>).

62 The species of animals captured in this study were identified by analyzing their cytochrome b  
63 gene nucleotide sequences, as described previously (10). The animal species were determined by  
64 BLAST search after performing Sanger sequencing.

65 After initial screening, viral sequences of mammarenavirus and orthohantavirus were not  
66 detected in any of the samples (Table 1). By contrast, novel orthonairovirus-like sequences were  
67 detected in 69 out of the 281 sampled animals (24.6%). BLAST search revealed that the newly  
68 identified sequences showed high similarity to Erve virus (ERVEV) or TFAV (62.8-74.4%). These  
69 viruses were previously identified among the *Crocidura* sp. found in France and Senegal, respectively  
70 (4,12). Notably, the virus prevalence in *Crocidura* sp. was significantly higher than that in all other  
71 captured rodents (virus prevalence in *Crocidura* sp. vs. rodents: 34.1% (44/129), odds ratio: 2.63, 95%  
72 CI: 1.50-4.62,  $p < 0.001$ ). This novel orthonairovirus was named Lamusara virus (LMSV), based on the  
73 identified place (Lambaréné) and virus hosts (“musaraigne”; “shrew” in French and “ra”; “rodent” in  
74 French).

75 Genus *Orthonairovirus* belongs to family *Nairoviridae*, which includes enveloped and  
76 negative-sense single-stranded RNA viruses (13). Its genome comprises large, medium, and small

77 segments encoding the RNA-dependent RNA polymerase (L), glycoprotein precursor (GPC), and  
78 nucleoprotein (N), respectively (14).

79 To determine longer viral genome sequences, we performed RT-PCR using RNA samples positive  
80 for the LMSV genome. To design the deduced primer sets, the nucleotide sequences of each genome  
81 segment of ERVEV and TFAV were aligned (GenBank accession numbers: JF911697-JF911699,  
82 KU925458-KU925460 (ERVEV), and NC\_039220-NC\_039222 (TFAV); Appendix Table). Once the  
83 amplicons were confirmed as the LMSV genome, Sanger sequencing was repeatedly performed to  
84 close sequence gaps.

85 Whole genome sequences of LMSV, consisting of three segments: large, medium, and small,  
86 were successfully determined (DDBJ accession numbers: LC671712-LC671787) in accordance with  
87 orthonairovirus genome organization. Each genome segment comprises a single open reading frame  
88 (ORF) encoding the L (11,583 nt / 3,861 aa), GPC (3,819 nt / 1,273 aa), and N (2,016 nt / 672 aa)  
89 proteins, respectively. Phylogenetic analysis was also performed among orthonairovirus  
90 protein-coding region of nucleotide sequences using IQ-TREE (<http://iqtree.cibiv.univie.ac.at/>) to  
91 genetically characterize LMSV. The results showed that all three LMSV encoding proteins were  
92 phylogenetically close to ERVEV and TFAV, yet formed unique phylogenetic clusters that differed  
93 from other orthonairovirus (Figure). Moreover, there were at least two distinct genotypes in the LMSV  
94 cluster of each segment according to the constructed trees. Comparison of nucleotide and amino acid  
95 sequences between two LMSV genotypes (strains CG002 vs. CG020) revealed that the sequences of

96 the GPC protein were highly conserved (82.5% and 92.6% at nucleotide and amino acid levels,  
97 respectively), whereas the sequences of L and N proteins were relatively divergent between the two  
98 genotypes (L: 68.6% and 66.9% at nucleotide and amino acid levels, respectively; N: 59.9% and  
99 61.4% at nucleotide and amino acid levels, respectively) (Table 2).

100 LMSV showed the highest sequence similarity to TFAV compared to other orthonairovirus, at  
101 nucleotide and amino acid levels in all three ORFs (LMSV CG002 vs. TFAV; L: 66.8% and 72.0% at  
102 nucleotide and amino acid levels, respectively; GPC: 69.0% and 70.8% at nucleotide and amino acid  
103 levels, respectively; N: 62.3% and 62.5% at nucleotide and amino acid levels, respectively) (Table 2).  
104 According to the criteria described by Walker et al., LMSV should be grouped into the genogroup  
105 *Thiafora* based on the amino acid sequence homology value (>52%) of the N protein between LMSV,  
106 ERVEV, and TFAV (4).

107

## 108 **Conclusions**

109 In this study, we identified a novel orthonairovirus, LMSV, drawn from small mammals captured  
110 in Gabon, Central Africa. According to our results, LMSV should be assigned to the genogroup  
111 *Thiafora*, based on its genetic relationship with ERVEV and TFAV. Further, we found that *Crocidura*  
112 sp. could be considered as the main host for LMSV. We also demonstrated that LMSVs have acquired  
113 significant sequence diversity. These results suggest the unique evolution and host adaptation of  
114 LMSV circulating among wildlife in Gabon.

115           A previous study suggested that ERVEV has a potential risk of causing neuropathogenic human  
116 diseases including thunderclap headaches (15). Here, we demonstrated preliminary evidence for the  
117 presence of possible causative agents of zoonotic diseases in Gabon. However, further studies are  
118 needed to understand the biological characteristics of LMSV. Moreover, surveillance studies of the  
119 seroprevalence of rodent-borne viruses, such as mammarenavirus and orthohantavirus, have  
120 previously been conducted among local Gabonese residents (9,10). By contrast, there are no reports  
121 specifically targeting seroprevalence of orthonairovirus. Taken together, our findings would provide  
122 novel insight into small mammal borne virus related to public health issues in Gabon.

123

124 **Acknowledgements**

125 We thank Ms. Miku Takano (Nagasaki University) and Ms. Izumi Suzumori (Japan International  
126 Cooperation Agency (JICA)) for the management of logistics, material transportation, and linguistic  
127 support. We are also grateful to all staff in the Department of Emerging Infectious Diseases of  
128 Nagasaki University, CERMEL, IRET, and JICA for their support and considerable encouragement.  
129 We would like to thank Editage ([www.editage.com](http://www.editage.com)) for English language editing. This work was  
130 supported by the Science and Technology Research Partnership for Sustainable Development  
131 (SATREPS) from the Japan International Cooperation Agency (JICA) and the Japan Agency for  
132 Medical Research and Development (AMED), JP21jm0110013, AMED, JP21jm0210072, and the  
133 Japan Society for the Promotion of Science (KAKENHI), JP17KK0170, and JP21K10415.

134

135 **Author's Bio**

136 Mr. Takehiro Ozeki is a graduate student at Nagasaki University. His research interests include  
137 emerging infectious diseases, virus discovery, and host innate immune defense.

138

139 **Address for Correspondence**

140 Jiro Yasuda, Department of Emerging Infectious Diseases, Institute of Tropical Medicine, Nagasaki  
141 University, 1-12-4, Sakamoto, Nagasaki 852-8523, Japan; Tel: +81-95-819-7848; Fax:  
142 +81-95-819-7851; Email: [j-yasuda@nagasaki-u.ac.jp](mailto:j-yasuda@nagasaki-u.ac.jp)



143

144 **References**

- 145 1. Meerburg BG, Singleton GR, and Kijlstra A. Rodent-borne diseases and their risks for public  
146 health. *Crit Rev Microbiol.* 2009; 35(3):221–70. <https://doi.org/10.1080/10408410902989837>
- 147 2. World Health Organization. Lassa fever.  
148 <https://www.who.int/news-room/fact-sheets/detail/lassa-fever>
- 149 3. Klempa B, Fichet-Calvet E, Lecompte E, Auste B, Aniskin V, Meisel H, et al. Novel Hantavirus  
150 Sequences in Shrew, Guinea. *Emerg Infect Dis.* 2007, 13 (3), 520–522.  
151 <https://doi.org/10.3201/eid1303.061198>.
- 152 4. Walker P. J, Widen S. G, Wood T. G, Guzman H, Tesh R. B, Vasilakis N. A. Global Genomic  
153 Characterization of Nairoviruses Identifies Nine Discrete Genogroups with Distinctive Structural  
154 Characteristics and Host-Vector Associations. *Am J Trop Med Hyg.* 2016, 94 (5), 1107–1122.  
155 <https://doi.org/10.4269/ajtmh.15-0917>.
- 156 5. Kenmoe S, Tchatchouang S, Ebogo-Belobo J. T, Ka'e A. C, Mahamat G, Guiamdjo Simo R. E, et  
157 al. Systematic Review and Meta-Analysis of the Epidemiology of Lassa Virus in Humans,  
158 Rodents and Other Mammals in Sub-Saharan Africa. *PLoS Negl Trop Dis.* 2020, 14 (8), e0008589.  
159 <https://doi.org/10.1371/journal.pntd.0008589>.
- 160 6. Mylne A. Q. N, Pigott D. M, Longbottom J, Shearer F, Duda K. A, Messina J. P, et al. Mapping the  
161 Zoonotic Niche of Lassa Fever in Africa. *Trans R Soc Trop Med Hyg.* 2015, 109 (8), 483–492.

162 <https://doi.org/10.1093/trstmh/trv047>.

163 7. Klempa B, Koivogui L, Sylla O, Koulemou K, Auste B, Krüger D. H, et al. Serological Evidence  
164 of Human Hantavirus Infections in Guinea, West Africa. *J Infect Dis.* 2010, 201 (7), 1031–1034.

165 <https://doi.org/10.1086/651169>.

166 8. Klempa B, Fichet-Calvet E, Lecompte E, Auste B, Aniskin V, Meisel H, et al. Hantavirus in  
167 African Wood Mouse, Guinea. *Emerg Infect Dis.* 2006, 12 (5), 838–840.

168 <https://doi.org/10.3201/eid1205.051487>.

169 9. Heinemann P, Tia M, Alabi A, Anon J.-C, Auste B, Essbauer S, et al. Human Infections by  
170 Non-Rodent-Associated Hantaviruses in Africa. *J Infect Dis.* 2016, 214 (10), 1507–1511.

171 <https://doi.org/10.1093/infdis/jiw401>.

172 10. Ushijima Y, Abe H, Ozeki T, Ondo G. N, Mbadinga M. J. V. M, Bikangui R, et al. Identification of

173 Potential Novel Hosts and the Risk of Infection with Lymphocytic Choriomeningitis Virus in

174 Humans in Gabon, Central Africa. *Int J Infect Dis.* 2021, 105, 452–459.

175 <https://doi.org/10.1016/j.ijid.2021.02.105>.

176 11. Ishii A, Thomas Y, Moonga L, Nakamura I, Ohnuma A, Hang'ombe B, Takada A, Mweene A,

177 Sawa H. Novel Arenavirus, Zambia. *Emerg Infect Dis.* 2011, 17 (10), 1921–1924.

178 <https://doi.org/10.3201/eid1710.10452>.

179 12. Chastel C, Main AJ, Richard P, Le Lay G, Legrand-Quillien MC, Beaucournu JC. Erve virus, a

180 probable member of Bunyaviridae family isolated from shrews (*Crocidura russula*) in France.

181 Acta Virol. 1989;33: 270–280.

182 13. Garrison A. R, Alkhovsky S. V, Avšič-Županc T, Bente D. A, Bergeron É, Burt F, et al. ICTV

183 Virus Taxonomy Profile: Nairoviridae. J Gen Virol. 2020; 101 (8), 798–799.

184 <https://doi.org/10.1099/jgv.0.001485>.

185 14. Kuhn J. H, Wiley M. R, Rodriguez S. E, Bào Y, Prieto K, Travassos da Rosa A. P. A, et al.

186 Genomic Characterization of the Genus Nairovirus (Family Bunyaviridae). Viruses. 2016, 8 (6).

187 <https://doi.org/10.3390/v8060164>.

188 15. Treib J, Dobler G, Haass A, Blohn W. von, Strittmatter M, Pindur G, et al. Thunderclap Headache

189 Caused by Erve Virus? Neurology. 1998; 50 (2), 509–511. <https://doi.org/10.1212/WNL.50.2.509>.

190

191 Table 1. Species of captured small mammals and results of virus screening

| Mammal species                 | Common name                 | Mammarenavirus | Orthohantavirus | Orthonairovirus |
|--------------------------------|-----------------------------|----------------|-----------------|-----------------|
| <i>Crocidura goliath</i>       | Goliath shrew               | 0/128*         | 0/128           | <b>44/128</b>   |
| <i>Crocidura poensis</i>       | Fraser's musk shrew         | 0/1            | 0/1             | 0/1             |
| <i>Hybomys univittatus</i>     | Peter's striped mouse       | 0/3            | 0/3             | 0/3             |
| <i>Hylomyscus</i> sp.          | African wood mouse          | 0/2            | 0/2             | 0/2             |
| <i>Lemniscomys striatus</i>    | Typical striped grass mouse | 0/3            | 0/3             | <b>1/3</b>      |
| <i>Lophuromys</i> sp.          | Brush-furred mouse          | 0/7            | 0/7             | 0/7             |
| <i>Mus minutoides</i>          | African pygmy mouse         | 0/41           | 0/41            | <b>6/41</b>     |
| <i>Mus musculus</i>            | House mouse                 | 0/3            | 0/3             | 0/3             |
| <i>Oenomys hypoxanthus</i>     | Common rufous-nosed rat     | 0/6            | 0/6             | <b>2/6</b>      |
| <i>Praomys misonnei</i>        | Misonne's soft-furred mouse | 0/65           | 0/65            | <b>11/65</b>    |
| <i>Rattus rattus</i>           | Black rat                   | 0/16           | 0/16            | <b>5/16</b>     |
| <i>Stochomys longicaudatus</i> | Target rat                  | 0/6            | 0/6             | 0/6             |
|                                |                             | 0/281          | 0/281           | 69/281          |

\*Number of virus-positive individuals/number of captured animals. Positive number is indicated in boldface.

192

193 Table 2. Pairwise comparisons of nucleotide and amino acid sequences among representative orthonairoviruses

|            | Nucleotide (%) |            |       |      |       |      |      |      |
|------------|----------------|------------|-------|------|-------|------|------|------|
|            | LMSV CG002     | LMSV CG020 | ERVEV | TFAV | CCHFV | HAZV | NSDV | DUGV |
| <b>L</b>   |                |            |       |      |       |      |      |      |
| LMSV CG002 |                | 68.6       | 65.0  | 66.8 | 53.5  | 52.0 | 52.7 | 54.1 |
| LMSV CG020 | 66.9           |            | 67.1  | 68.4 | 53.0  | 53.1 | 53.3 | 55.3 |
| ERVEV      | 69.6           | 67.9       |       | 68.8 | 52.4  | 51.3 | 51.5 | 53.1 |
| TFAV       | 72.0           | 69.0       | 73.9  |      | 52.2  | 51.2 | 52.3 | 52.6 |
| CCHFV      | 47.7           | 45.6       | 47.9  | 49.1 |       | 63.4 | 64.5 | 62.9 |
| HAZV       | 48.7           | 47.4       | 49.7  | 49.9 | 66.8  |      | 65.4 | 63.8 |
| NSDV       | 48.1           | 46.7       | 48.9  | 50.8 | 67.5  | 71.2 |      | 66.3 |
| DUGV       | 48.7           | 47.2       | 48.7  | 49.8 | 65.2  | 67.8 | 70.2 |      |
| <b>GPC</b> |                |            |       |      |       |      |      |      |
| LMSV CG002 |                | 82.5       | 67.9  | 69.0 | 43.8  | 44.8 | 43.5 | 45.3 |
| LMSV CG020 | 92.6           |            | 66.7  | 67.7 | 43.6  | 44.6 | 43.4 | 45.1 |
| ERVEV      | 68.5           | 68.3       |       | 70.0 | 43.5  | 44.9 | 45.0 | 45.1 |
| TFAV       | 70.8           | 70.4       | 73.0  |      | 42.9  | 44.2 | 43.1 | 44.7 |
| CCHFV      | 35.1           | 35.4       | 37.4  | 35.6 |       | 49.7 | 53.6 | 53.4 |
| HAZV       | 39.5           | 39.2       | 39.7  | 39.5 | 41.6  |      | 59.1 | 54.7 |
| NSDV       | 37.2           | 37.2       | 37.6  | 37.2 | 45.8  | 44.4 |      | 58.8 |
| DUGV       | 37.0           | 36.9       | 37.2  | 35.9 | 44.1  | 50.4 | 55.6 |      |
| <b>N</b>   |                |            |       |      |       |      |      |      |
| LMSV CG002 |                | 59.9       | 60.9  | 62.3 | 53.3  | 52.9 | 54.7 | 40.6 |
| LMSV CG020 | 61.4           |            | 68.9  | 70.9 | 52.4  | 51.2 | 52.3 | 51.4 |
| ERVEV      | 61.2           | 72.9       |       | 67.9 | 51.7  | 51.2 | 51.5 | 51.4 |
| TFAV       | 62.5           | 76.2       | 60.8  |      | 52.6  | 50.2 | 51.7 | 51.7 |
| CCHFV      | 45.5           | 42.9       | 42.2  | 44.9 |       | 61.1 | 63.1 | 60.4 |
| HAZV       | 44.7           | 41.6       | 42.1  | 42.7 | 60.3  |      | 63.2 | 59.9 |
| NSDV       | 46.0           | 43.1       | 43.8  | 45.3 | 62.2  | 64.0 |      | 63.5 |
| DUGV       | 41.8           | 42.3       | 44.2  | 44.2 | 57.7  | 56.2 | 60.5 |      |

**Amino acid (%)**

Partial sequence of L protein at position 6,913-11,471 nt on LMSV L-segment (DDBJ accession numbers LC671712 for CG002 and LC671780 for CG020) and complete nucleotide and amino acid sequences of GPC and N protein were analyzed by MEGA7 software (<https://www.megasoftware.net/>). Percent values of nucleotide and amino acid sequence identities are indicated in the upper right half and lower left half, respectively. LMSV, Lamusara virus (DDBJ accession numbers: LC671712-LC671714 for CG002 and LC671780-LC671782 for CG020); ERVEV, Erve virus (GenBank accession numbers: JF911697-JF911699); TFAV, Thiafora virus (GenBank: NC\_039220-NC\_039222); CCHFV, Crimean-Congo hemorrhagic fever virus (GenBank: NC\_005300-NC\_005302); HAZV, Hazara virus (GenBank: NC\_038709-NC\_038711); NSDV, Nairobi sheep disease virus (GenBank: EU697950, EU697951 and AF504294); DUGV, Dugbe virus (GenBank: NC\_004157-NC\_004159).

194

195 Appendix Table. Primers used for virus screening and amplification of Lamusara virus genome

| Primer name                                                    | Description                                              | Sequence (5'-3')                |
|----------------------------------------------------------------|----------------------------------------------------------|---------------------------------|
| <b>Primers used for virus screening</b>                        |                                                          |                                 |
| Arena-F*                                                       | Forward primer for <i>mammarenavirus</i> detection       | CACATAGTTGGGCCCCACTTGCTGTGATC   |
| Arena-R*                                                       | Reverse primer for <i>mammarenavirus</i> detection       | AGGATAAGTGAAGAGAGAGTAATTC       |
| HAN-L-F2*                                                      | Forward primer for <i>orthohantavirus</i> detection      | TGCWGATGCHACIAARTGGTC           |
| HAN-L-R2*                                                      | Reverse primer for <i>orthohantavirus</i> detection      | GCRTCRCWGWARTGRTGDGCAA          |
| Nairo-F                                                        | Forward primer for <i>orthonairovirus</i> detection      | AARTGGGGYCCIATICACTGYTYTC       |
| Nairo-R                                                        | Reverse primer for <i>orthonairovirus</i> detection      | GGRACACTRTRTACATISCYTGTG        |
| <b>Primers used for amplification of Lamusara virus genome</b> |                                                          |                                 |
| LMSV-L-F1                                                      | Forward primer for L protein at position 1-4,809 nt      | CGAGTATCTCAAAGAAAGCAATCCC       |
| LMSV-L-R1                                                      | Reverse primer for L protein at position 1-4,809 nt      | CTCCCAGTTCATATGTCTMTCTGCAG      |
| LMSV-L-F2                                                      | Forward primer for L protein at position 4,390-7,013 nt  | AATGGCATAAGCAGATTRTCCTG         |
| LMSV-L-R2                                                      | Reverse primer for L protein at position 4,390-7,013 nt  | GCAGGRATTTCAATTTGTCGAC          |
| LMSV-L-F3                                                      | Forward primer for L protein at position 7,404-11,583 nt | TAACTCATGCTGGCAGTTCAGATG        |
| LMSV-L-R3                                                      | Reverse primer for L protein at position 7,404-11,583 nt | TTTCTCAAAGATAGTATTCCTCCCTACC    |
| LMSV-M-F1                                                      | Forward primer for GPC at position 1-3,011 nt            | TCTCAAAGAAAGWCTAGCGGCAAACCTCGTC |
| LMSV-M-R1                                                      | Reverse primer for GPC at position 1-3,011 nt            | CCAGCTTCTGTGGTGCAGTAGTAGTC      |
| LMSV-M-F2                                                      | Forward primer for GPC at position 2,505-3,810 nt        | ACTTGGTGYTGGGGAGTTGGWACAG       |
| LMSV-M-R2                                                      | Reverse primer for GPC at position 2,505-3,810 nt        | TCTCAAAGATATAGGAGCGGCATACTCG    |
| LMSV-S-F                                                       | Forward primer for N protein at position 1-2,016 nt      | TCTCAAAGAAAGYTGCTGYATACTG       |
| LMSV-S-R                                                       | Reverse primer for N protein at position 1-2,016 nt      | TCTCAGAAGATAGTGTGCTGCATACTG     |

\*Published primers (8,11)

196

## 197 Figure Legend

198 Maximum-likelihood phylogenetic trees of LMSV were constructed based on L protein partial  
 199 nucleotide sequences (at position 6,913-11,471 nt on LMSV large-segment (DDBJ accession number:  
 200 LC671712)) (A), GPC complete nucleotide sequences (B) and N protein complete nucleotide  
 201 sequences (C) using IQ-tree (<http://iqtree.cibiv.univie.ac.at/>) with 1,000 bootstraps. Bootstrap values  
 202 of  $\geq 70\%$  are shown at the nodes of the trees. Nine genogroups of genus *Orthonairovirus* are shown on

203 the right of the trees (4) and LMSV clusters in each segment were circled by broken line. The scale bar

204 indicates nucleotide substitutions per site.

A

Lamusara virus

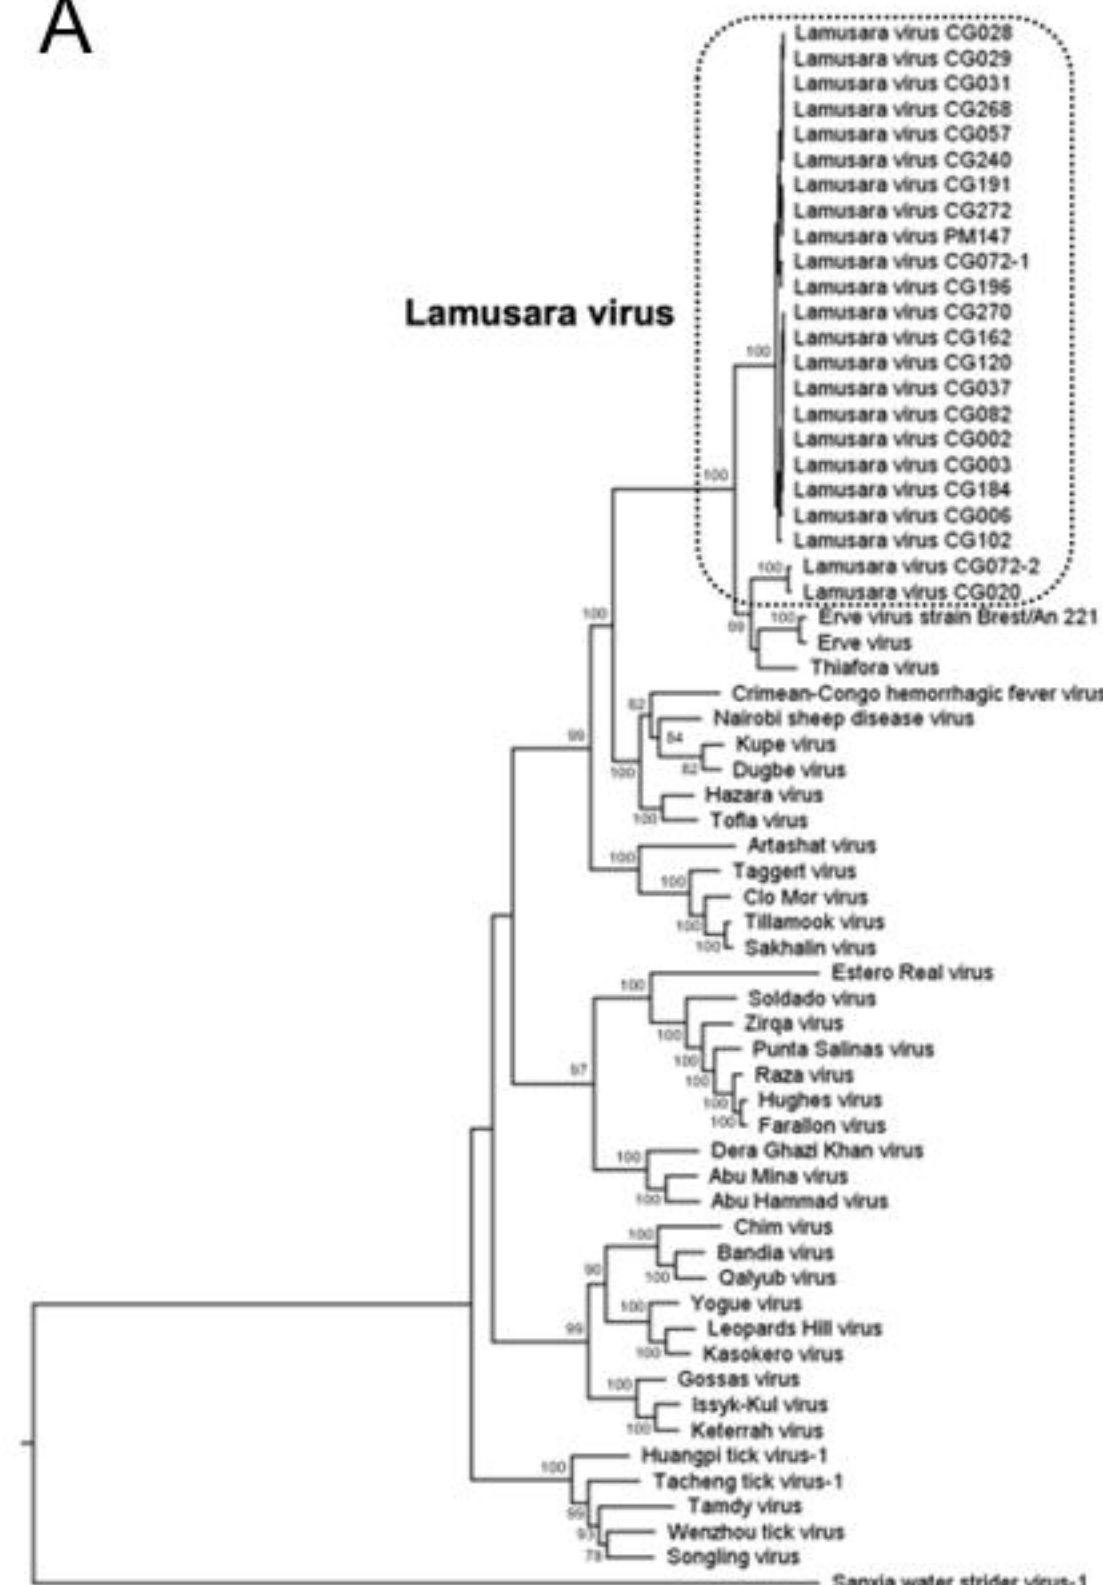

Genogroup

Thiafora

Nairobi sheep disease

Artashat and Sakhalin

Estero Real and Hughes

Dera Ghazi Khan

Qalyub

Kasokero

Keterah

Tamdy

Outgroup

B

Lamusara virus

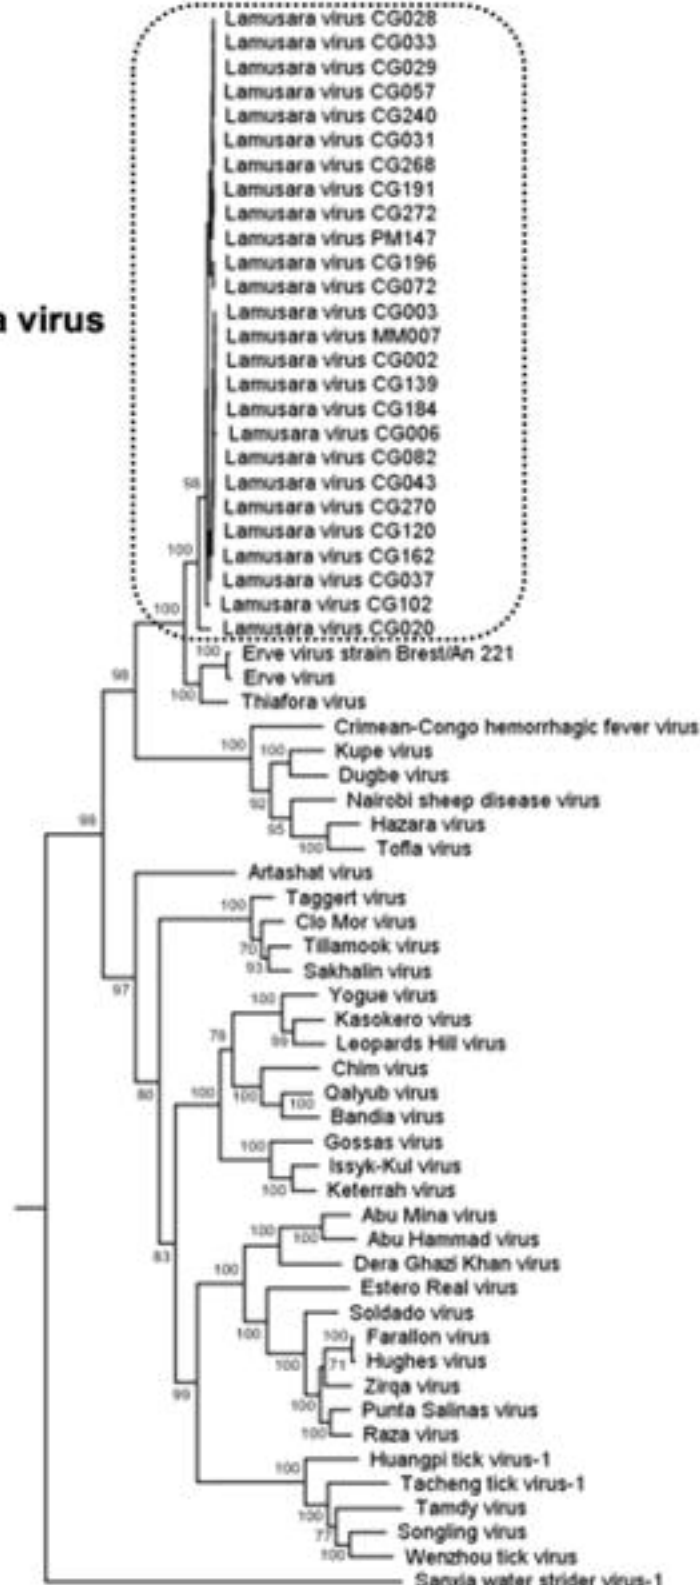

Genogroup

Thiafora

Nairobi sheep disease

Artashat and Sakhalin

Kasokero

Qalyub

Keterah

Dera Ghazi Khan

Estero Real and Hughes

Tamdy

Outgroup

C

Lamusara virus

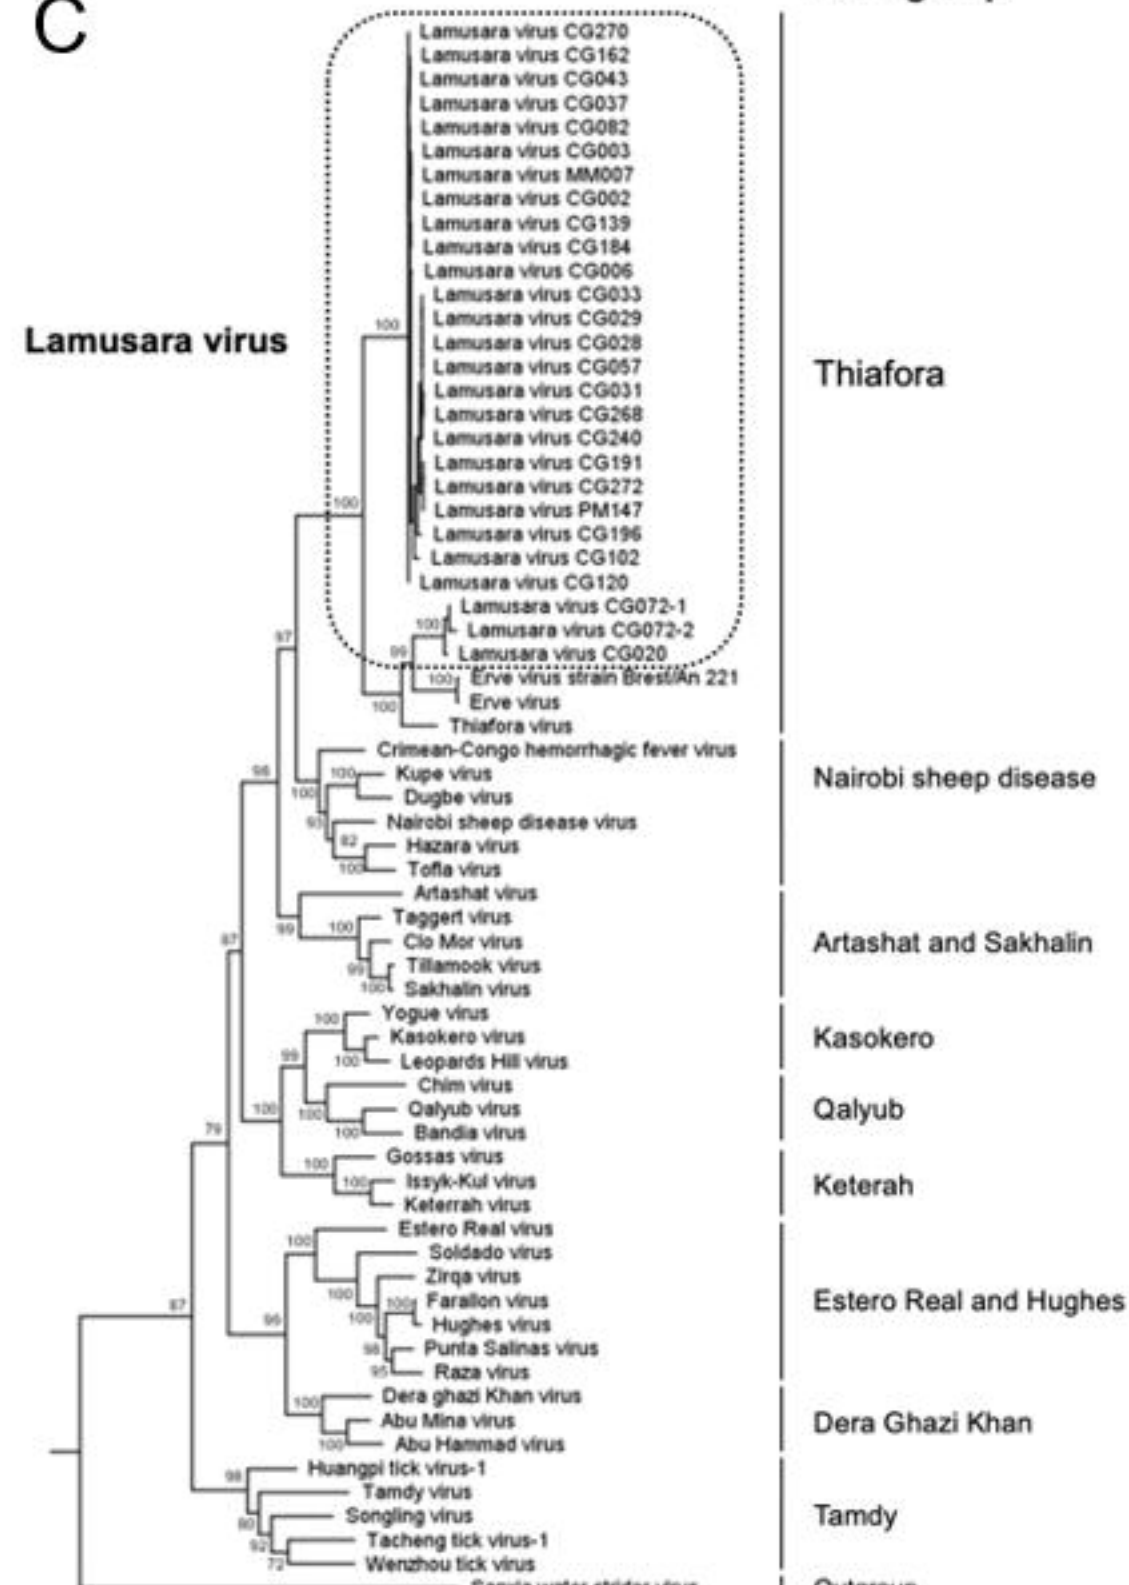

Genogroup

Thiafora

Nairobi sheep disease

Artashat and Sakhalin

Kasokero

Qalyub

Keterah

Estero Real and Hughes

Dera Ghazi Khan

Tamdy

Outgroup
